# Supplementary material
Source: PubMed Central journal article supplement (PMC9671669)
Supplement: mmc1.pdf [file mmc1.pdf]

# THE LANCET

## Respiratory Medicine

### Supplementary appendix

This appendix formed part of the original submission and has been peer reviewed. We post it as supplied by the authors.

Supplement to: Lorusso R, De Piero ME, Mariani S, et al. In-hospital and 6-month outcomes in patients with COVID-19 supported with extracorporeal membrane oxygenation (EuroECMO-COVID): a multicentre, prospective observational study. *Lancet Respir Med* 2022; published online Nov 16. [https://doi.org/10.1016/S2213-2600\(22\)00403-9](https://doi.org/10.1016/S2213-2600(22)00403-9).

Supplementary Appendix

**In-hospital and 6-month Outcomes of COVID-19 Patients Supported with  
Extracorporeal Membrane Oxygenation:  
the EuroECMO-COVID Multicenter Prospective Observational Study**

**Table of contents**

**Authors.....3**  
**Contributors.....4**  
**Collaborators.....5**  
**Methods.....13**  
**Data Collection.....15**  
**Supplementary Tables.....16**  
**Supplementary Figures.....25**  
**STROBE Checklist.....34**

**Authors:**

Prof. Roberto Lorusso<sup>1,2\*</sup>, Ph.D., Maria Elena De Piero<sup>1,2\*</sup>, M.D., Silvia Mariani<sup>1,2</sup>, M.D., Michele Di Mauro,<sup>1,2</sup>, Ph.D., Prof. Thierry Folliguet<sup>3</sup>, Ph.D., Prof. Fabio Silvio Taccone<sup>4</sup>, Ph.D., Luigi Camporota<sup>5</sup>, Ph.D., Justyna Swol<sup>6</sup>, Ph.D., Dominik Wiedemann<sup>7</sup>, Ph.D., Mirko Belliato<sup>8</sup>, M.D., Lars Mikael Broman<sup>9</sup>, Ph.D., Alain Vuylsteke<sup>10</sup>, M.D., Yigal Kassif<sup>11</sup>, M.D., Anna Mara Scandroglio<sup>12</sup>, M.D., Vito Fanelli<sup>13</sup>, Ph.D., Philippe Gaudard<sup>14,15</sup>, Ph.D., Stephane Ledot<sup>16</sup>, M.D., Julian Barker<sup>17</sup>, M.D., Prof. Udo Boeken<sup>18</sup>, Ph.D., Sven Maier<sup>19,20</sup>, M.Sc., Alexander Kersten<sup>21</sup>, M.D., Prof. Bart Meyns<sup>22</sup>, Ph.D., Matteo Pozzi<sup>23</sup>, M.D., Finn M. Pedersen<sup>24</sup>, M.D., Peter Schellongowski<sup>25</sup>, Ph.D., Prof. Kaan Kirali<sup>26</sup>, Ph.D., Nicholas Barrett<sup>5^</sup>, M.D., Jordi Riera <sup>27^</sup>, Ph.D., Prof. Thomas Mueller<sup>28^</sup>, M.D., Prof. Jan Belohlavek<sup>29^</sup>, Ph.D

**Affiliations:** <sup>1</sup>Cardio-Thoracic Surgery Department Heart and Vascular Centre Maastricht University Medical Centre, Maastricht, The Netherlands; <sup>2</sup>Cardiovascular Research Institute Maastricht (CARIM), Maastricht, The Netherlands; <sup>3</sup>Department of Cardiac Surgery, APHP, Hopitaux Universitaires Henri Mondor, Créteil, France; <sup>4</sup>Department of Intensive Care, Erasme Hospital, Université Libre de Bruxelles, Brussels, Belgium; <sup>5</sup>Department of Adult Critical Care, Guy's and St Thomas' NHS Foundation, Health Centre for Human and Applied Physiological Sciences, London, UK; <sup>6</sup>Department of Medicine, Paracelsus Medical University, Nuremberg, Germany; <sup>7</sup>Department of Cardiac Surgery, Medical University Hospital of Vienna, Vienna, Austria; <sup>8</sup>Anestesia e Rianimazione II Cardiopolmonare, Fondazione IRCCS Policlinico San Matteo, Pavia, Italy; <sup>9</sup>ECMO Centre Karolinska, Karolinska University Hospital and department of Physiology and Pharmacology, Karolinska Institutet, Stockholm, Sweden; <sup>10</sup>ECMO Retrieval Service & Critical Care, Royal Papworth Hospital, NHS Foundation Trust, Cambridge Biomedical Campus, Cambridge, UK; <sup>11</sup>Heart Transplantation Unit, Leviev Cardiothoracic and Vascular Center, Sheba Medical Center, Israel; <sup>12</sup>Department of Anesthesia and Intensive Care, IRCCS San Raffaele Scientific Institute, Milan, Italy; <sup>13</sup>Department of Surgical Sciences, Anesthesia and Intensive Care Medicine, Città della Salute e della Scienza Hospital, University of Turin, Turin, Italy; <sup>14</sup>Department of Anesthesiology and Critical Care Medicine, Arnaud de Villeneuve Hospital, CHU Montpellier, France; <sup>15</sup>PhyMedExp, University of Montpellier, INSERM, CNRS, Montpellier, France; <sup>16</sup>Intensive Care Unit, Royal Brompton & Harefield, London, UK; <sup>17</sup> Cardiothoracic Critical Care Unit, Whythenshawe Hospital, Manchester, UK; <sup>18</sup>Department of Cardiac Surgery, Heinrich Heine University, Dusseldorf, Germany; <sup>19</sup>Department of Cardiovascular Surgery, Heart Center University Freiburg- Bad Krozingen, Bad Krozingen, Germany; <sup>20</sup>Faculty of Medicine, University of Freiburg, Freiburg, Germany; <sup>21</sup>Medizinische Klinik, Uniklinik RWTH, Aachen, Germany; <sup>22</sup>Department of Cardiac Surgery, Universitair Ziekenhuis Leuven Gasthuisberg University Hospital, Leuven, Belgium; <sup>23</sup>Department of Cardiac Surgery, Louis Pradel Hospital, Lyon, France; <sup>24</sup>Cardiothoracic Intensive Care Unit, University Hospital, Copenhagen,

Denmark;<sup>25</sup>Department of Medicine I, Intensive Care Unit, Comprehensive Cancer Center, Center of Excellence in Medical Intensive Care (CEMIC), Medical University of Vienna, Vienna, Austria;<sup>26</sup>Cardiovascular Surgery Department, Kosuyolu High Specialization Education and Research Hospital, Istanbul;<sup>27</sup>Critical Care Department, Vall d'Hebron Research Institute, Barcelona, Spain;<sup>28</sup>Department of Internal Medicine II, University Hospital of Regensburg, Regensburg, Germany;<sup>29</sup>2nd Department of Internal Medicine, Cardiovascular Medicine General Teaching Hospital and 1st Faculty of Medicine, Charles University in Prague, Prague, Czech Republic

### **Contributors:**

Valeria Lo Coco<sup>1</sup>, M.D., Iwan C.C. van der Horst<sup>2,3</sup>, Ph.D, Bas van Bussel<sup>3,4</sup>,Ph.D, Ronny M. Schnabel<sup>3</sup>, Ph.D, Thijs Delnoij<sup>3,5</sup>, M.D., Gil Bolotin<sup>6</sup>, Ph.D., Ferdinando L.Lorini<sup>7</sup>, M.D., Martin O. Schmiady<sup>8</sup>, Ph.D., David Schibilsky<sup>9,10</sup>, M.D., Mariusz Kowalewski<sup>11,12</sup>Ph.D., Ph.D., Luis F. Pinto<sup>13</sup>, C.P, Pedro E. Silva<sup>14</sup>, M.D., Igor Kornilov<sup>15,16</sup>, M.D., Aaron Blandino Ortiz<sup>17</sup>, M.D., Leen Vercaemst<sup>18</sup>, C.P, Simon Finney<sup>19</sup>, M.D., Peter Paul Roeleveld<sup>20</sup>,Ph.D., Matteo Di Nardo<sup>21</sup>, M.D., Felix Hennig<sup>22</sup>,M.D., Marta Velia Antonini<sup>23</sup>, C.P, Mark Davidson<sup>24</sup>, M.D., Tim J.Jones<sup>25</sup>, M.D.

**Affiliations:**<sup>1</sup>Cardio-Thoracic Surgery Department Heart and Vascular Centre Maastricht University Medical Centre, Maastricht, The Netherlands; <sup>2</sup>Cardiovascular Research Institute Maastricht (CARIM), Maastricht, The Netherlands; <sup>3</sup>Department of Intensive Care, Maastricht University Medical Centre, Maastricht, The Netherlands; <sup>4</sup>Care and Public Health Research Institute, Maastricht University, Maastricht, The Netherlands; <sup>5</sup>Department of Cardiology, Maastricht University Medical Centre, Maastricht, The Netherlands; <sup>6</sup>Department of Cardiac Surgery, Rambam Health Care Campus, Haifa, Israel;<sup>7</sup> Department of Anesthesia and Intensive Care, ASST Papa Giovanni XXIII, Bergamo, Italy; <sup>8</sup>Department of Cardiac Surgery, University Hospital Zurich, Zurich, Switzerland;<sup>9</sup>Department of Cardiovascular Surgery, Heart Center University Freiburg- Bad Krozingen, Bad Krozingen, Germany;<sup>10</sup>Faculty of Medicine, University of Freiburg, Freiburg, Germany; <sup>11</sup>Clinical Department of Cardiac Surgery, Central Clinical Hospital of the Ministry of Interior and Administration, Centre of Postgraduate Medical Evaluation, Warsaw, Poland;<sup>12</sup> Thoracic Research Centre, Collegium Medicum, Nicolaus Copernicus University, Bydgoszcz, Poland; <sup>13</sup>Centro Hospitalar Sao Joao, Porto, Portugal;<sup>14</sup>Centro Hospitalar Universitario de Lisboa Central- Hospital de Sao José, Lisbon, Portugal;<sup>15</sup>Novosibirsk National Medical Research Center, Novosibirsk, Russian Federation;<sup>16</sup>Milton S. Hershey Medical Center Penn State University, USA; <sup>17</sup>Department of Intensive Care Medicine, Scientific Research Methodology, Ramón y Cajal University Hospital, Universidad de Alcalá, Instituto Ramón y Cajal de Investigación Sanitaria, Madrid, Spain; <sup>18</sup>Department of Cardiac Surgery, Universitair Ziekenhuis Leuven Gasthuisberg University Hospital, Leuven, Belgium; <sup>19</sup>Intensive Care

Unit, Barts Health NHS Trust, London, UK;<sup>20</sup>Pediatric Intensive Care Unit, Leiden University Medical Centre, Leiden, The Netherlands;<sup>21</sup>Neonatal and Pediatric Intensive Care Unit, Bambin Gesù' Hospital, Rome, Italy;<sup>22</sup>Cardiac Surgery Department, German Heart Institute, Berlin, Germany;<sup>23</sup>Cardiac Surgery Department, Ospedale Maggiore, Parma, Italy;<sup>24</sup>Pediatric Intensive Care Unit, Children Hospital, Glasgow, Scotland;<sup>25</sup>Cardiac Surgery Department, Women and Children Hospital, Birmingham, UK

#### **Collaborators:**

Dedicated to clinical work on patients with coronavirus disease 2019 (COVID-19) supported on ECMO and data collection into the EuroECMO-COVID Dataset

#### **Austria:**

**Medical University Hospital Vienna:** Thomas Staudinger, M.D.

**Medical University Hospital of Innsbruck:** Peter Mair, M.D., Juliane Kilo, M.D., Christoph Krapf, M.D., Kathrin Erbert, M.D., Andreas Peer, M.D., Nikolaos Bonaros, M.D., Ph.D.

**University Hospital St Polten, Lilienfeld:** Florian Kotheletner ECCP

**Kepler University Hospital, Linz:** Niklas Krenner Mag, M.Sc.

#### **Belarus:**

**Republic Center, Minsk:** Shestakova Liana, M.D.

#### **Belgium:**

**Gasthuisberg Ziekenhuis, Catholic University, Leuven:** Greet Hermans, M.D., Dieter Dauwe, M.D., Philippe Meersseman, M.D.

**OLV Hospital Aalst:** Bernard Stockman M.D.

**Erasmus Hospital, Université Libre de Bruxelles:** Leda Nobile MD, Olivier Lheureux M.D., Alexandre Nrasseurs MD, Jacques Creuter M.D.

**CHIREC Hospitals, Université Libre de Bruxelles:** Daniel De Backer MD, Simone Giglioli M.D., Gregoire Michiels, M.D., Pierre Foulon, M.D.

**University Hospital Brussels:** Matthias Raes M.D.

**University Hospital, Antwerp:** Inez Rodrigus M.D., Ph.D., Matthias Allegaert, ECCP, Philippe Jorens M.D., Ph.D., Gerdy Debeucklare ECCP, MScN, BScN

**CHU, Charleroi:** Michael Piagnarelli M.D., Ph.D., Patrick Biston M.D.

**University Hospital Ghent:** Harlinde Peperstraete M.D., Komeel Vandewiele ECCP

**CHU St Pierre de Bruxelles, Université Libre de Bruxelles Hospital:** Olivier Germay ECCP

**Az Sint Jan Brugge\_Oostende av.Bruges:** Vandeweghe Dimitri ECCP, Havrin Sven ECCP, Marc Bourgeois M.D.

**CHU Sart Tilman, Liege:** Marc-Gilbert Lagny ECCP, Ph.D., Genette Aloïs, ECCP, Nathalie Layios, Benoit Misset M.D., Ph.D.

**Pole Hospitalier Jolimont, La Louviere Hospital:** Romain Courcelle M.D.

**Jessa Hospital, Hasselt:** Philippe Jr Timmermans M.D., Alaaddin Yilmaz, Michiel Vantomout, Jeroen Lehaen CCP, ECCP, Ame Janssen

**Genk Hospital:** Herbert Gutermann M.D., Maarten Strauven M.D.

**AZ Delta Hospital, Roeselare:** Piet Lormans, M.D., Bruno Verhamme, M.D., Catherine Vandewaeter, M.D., Frederik Bonte, E.C.C.P.

**Sint Jan Hospital, Brussels:** Dominique Vionne, E.C.C.P.

### **Czech Republic:**

**General University Hospital, Charles University, Prague:** Martin Balik M.D., Ph.D., Jan Blàha M.D., Ph.D., Michal Lips M.D., Michal Othal M.D.

**ECMO Center, Ostrava:** Filip Bursa, M.D., Ph.D.

**University Hospital Trinec:** Radim Spacek ,M.D.

### **Denmark:**

**Aarhus University Hospital:** Steffen Christensen M.D., Ph.D.

**Rigshospitalet, University of Copenhagen:** Vibeke Jørgensen, M.D., Marc Sørensen, M.D., Søren A. Madsen, MD

### **Estonia:**

**North Estonian Regional Hospital:** Severin Puss, M.D.

**University Clinic Tartu:** Aleksandr Beljantsev, M.D.

### **France:**

**Henri Mondor Hospital, Creteil:** Gabriel Saiydoun M.D., Antonio Fiore M.D.

**University Montpellier, University of Montpellier, INSERIM, CNRS, PhyMedExp, CHU Montpellier:** Pascal Colson, M.D., Florian Bazalgette MD, Xavier Capdevila MD

**Hospital Center of Perpignan:** Sebastien Kollen M.D.

**University Hospital of Nimes:** Laurent Muller M.D.

**Hospices Civils de Lyon and Claude Bernard University, Lyon:** Jean-Francois Obadia M.D., PhD, Pierre-Yves Dubien, M.D., Jean Christophe Richard, M.D., Ph.D.

**CHU University Hospital, Rennes:** Alessandro Paradiso ECCP, Jean-Philippe Verhoye M.D., PHD, Erwan Flecher M.D., Ph.D, Lucrezia Ajrhourh ECCP

**Centre Hospitalier Universitarie de Dijon, Université de Bourgogne Franche-Comtè:** Pierre Gregoire Guinot M.D., Ph.D.

**Marne-la Vallee Hospital Center-Jossigny:** Jonathan Zarka M.D.

**CHU Amiens:** Patricia Besserve M.D.

## Germany:

**University Medical Center Regensburg:** Maximilian V. Malfertheiner MD, Esther Dreier MS, Birgit Heinze MS

**Heinrich Heine University, Dusseldorf:** Payam Akhyari M.D., Artur Lichtenberg M.D., Hug Aubin M.D., Alexander Assman, M.D.

**Leipzig Heart Center:** Diyar Saeed M.D., Ph.D., Holger Thiele M.D., Ph.D.

**Paracelsus Medical University, Nuremberg:** Matthias Baumgaertel M.D.

**Hannover Medical School:** Jan D Schmitto, M.D., Ph.D., Natanov Ruslan, M.D., Axel Haverich, M.D., Ph.D.

**West-German Heart and Vascular Center, University of Duisburg, Essen:** Matthias Thielmann M.D., Ph.D., Thorsten Brenner M.D., Arjang Ruhpawar M.D., Ph.D.

**University Heart Center Freiburg Bad Krozingen, Bad Krozingen; Faculty of Medicine, University of Freiburg, Freiburg:** Christoph Benk M.D., Ph.D., Martin Czerny, M.D., MBA; Dawid L Staudacher M.D, Fridhelm Beyersdorf M.D, PhD

Dept of Anesthesiology and Intensive Care, Medical Center ,University of Freiburg, Freiburg: Johannes Kalbhenn M.D.

**University Hospital, Tubingen:** Philipp Henn MD, Aron-Frederik Popov M.D. Ph.D.

**ECMO Center Kassel:** Torje Iuliu M.D., Ralf Muellenbach M.D. Ph.D., Christian Reyher M.D., Caroline Rolfes, M.D.

**ECLS Centre Frankfurt University Hospital:** Gosta Lotz MD, Michael Sonntagbauer M.D., Helen Winkels M.D., Julia Fichte M.D.

**University Hospital RWTH Aachen:** Robert Stohr M.D., Ph.D., Sebastian Kalverkamp M.D., Ph.D.

**ARDS E-ECMO Centre Koln-Merheim:** Christian Karagiannidis M.D., Simone Schafer M.D., Alexei Svetlitchny M.D.

**Asklepios Klinik Langen:** Julia Fichte M.D., Hans-Bernd Hopf M.D.

**Eppendorf University Hospital, Hamburg:** Dominik Jarczak M.D.

**Helios Klinikum Erfurt:** Heinrich Groesdonk M.D. P.h.D., Magdalena Rommer M.D., Jan Hirsch M.D., Christian Kaehny M.D.

## Greece:

**Athens Medical Center:** Dimitros Soufleris M.D.

**1st department of Respiratory Medicine, Medical School, National and Kapodistrian University of Athens, General Hospital for the Diseases of the Chest "Sotiria":** Georgios Gavriilidis, M.D., Konstantinos Pontikis, M.D. Magdalini Kyriakopoulou, M.D., Anna Kyriakoudi, M.D.

## Ireland:

**Mater Misericordiae University Hospital, Dublin:** Serena O'Brien, M.Sc., Ian Conrick-Martin, M.D., Edmund Carton, M.D.

## Israel:

**Rambam Medical Centre:** Maged Makhoul, M.D., Josef Ben-Ari, M.D., Amir Hadash, M.D.

**Sheba Medical Center:** Alexander Kogan, M.D., Reut Kassif Lerner, M.D., Anas Abu-Shakra, M.D.



**The Baruch Padeh Medical Center:** Moshe Matan, M.D., Ahmad Balawona, M.D., Erez Kachel, M.D., Roman Altshuler, M.D.

**Soroka Medical Center:** Ori Galante, M.D., Lior Fuchs, M.D., Yaniv Almog, M.D., Yaron Shlomo Ishay, M.D.

**Sourasky Medical Center:** Yael Lichter, M.D., Amir Gal-oz, M.D., Uri Carmi, M.D., Asaph Nini, M.D.

**Wolfson Medical Center:** Arie Soroksky, M.D., Hagi Dekel, M.D., Ziv Rozman, M.D., Emad Tayem, M.D.

**Shamir Medical Center:** Eduard Ilgiyaev, M.D., Yuval Hochman, M.D., Daniel Miltau, M.D., Avigal Rapoport, M.D.

**Carmel Medical Center:** Arie Eden, M.D., Dmitry Kompanietz, M.D., Yousif Michael, M.D., Miri Golos, M.D.

### **Italy:**

**Papa Giovanni XXIII Hospital, Bergamo:** Lorenzo Grazioli, M.D., Davide Ghitti ECCP

**S. Orsola University Hospital, Bologna:** Antonio Loforte M.D., Daniela Di Luca M.D., Massimo Baiocchi M.D., Davide Pacini M.D.

**Niguarda Hospital, Milan:** Antioco Cappai M.D., Paolo Meani, M.D., Michele Mondino M.D., Claudio Francesco Russo MD

**S. Donato Hospital, Milan:** Marco Ranucci M.D., Dario Fina M.D., Mauro Cotza, CCP, Andrea Ballotta M.D.

**IRCCS San Raffaele Scientific Institute, Milan:** Giovanni Landoni, M.D., Pasquale Nardelli, M.D., Evgeny V. Fominski, M.D., Ph.D.;

**AOU Città della Salute e della Scienza di Torino, University of Turin:** Luca Brazzi M.D., Ph.D., Giorgia Montrucchio M.D., Gabriele Sales M.D., Umberto Simonetti M.D.

**S. Giovanni Bosco Hospital, Turin:** Sergio Livigni M.D., Daniela Silengo M.D., Giulia Arena, M.D., Stefania Stavrula Sovatzis, M.D.

**Foundation IRCCS Policlinico San Matteo, Pavia:** Antonella Degani ECCP; Mariachiara Riccardi MD, Elisa Milanese M.D.

**IRCCS-ISMETT Hospital, Palermo:** Giuseppe Raffa MD, PhD, Gennaro Martucci MD, Antonio Arcadipane M.D., Giovanna Panarello, MD

**Spedali Civili Hospital, Brescia:** Giovanni Chiarini M.D., Sergio Cattaneo M.D., Carmine Puglia M.D., Stefano Benussi M.D.

**S. Gerardo Hospital, Monza:** Giuseppe Foti M.D., Marco Giani M.D., Michela Bombino M.D., Maria Cristina Costa ECCP, Roberto Rona M.D., Leonello Avalli M.D.

**Ospedali Riuniti, Lancisi Cardiovascular Center, Ancona:** Abele Donati M.D., Ph.D., Roberto Carozza ECCP; Francesco Gasparri M.D., Andrea Carsetti M.D.

**S. Bortolo Hospital, Vicenza:** Marco Picichè M.D., Ph.D., Anna Marinello M.D., Vinicio Danzi M.D., Anita Zanin M.D.

**Gruppo Villa Maria Pia Hospital, Bari:** Ignazio Condello ECCP, Flavio Fiore M.D., Ph.D., Marco Moscarelli M.D., Ph.D., Giuseppe Nasso M.D., Ph.D., Giuseppe Speziale M.D., Ph.D.

**S. Giorgio Clinic, Alessandria:** Luca Sandrelli M.D.

**S. Camillo Hospital, Rome:** Andrea Montalto M.D., Francesco Musumeci M.D.

**Bufalini Hospital, Cesena:** Alessandro Circelli M.D., Emanuele Russo M.D., Vanni Agnoletti M.D.

**Policlinico Hospital, Bari:** Ruggero Rociola, ECCP, Aldo D. Milano, M.D.

**Federico II University Hospital, Naples:** Emanuele Pilato MD, Giuseppe Comentale MD

**Sant'Ambrogio Cardiothoracic Center Milan:** Andrea Montisci M.D.

**Sapienza University of Rome, Policlinico Umberto I, Rome:** Francesco Alessandri M.D., Antonella Tosi M.D., Francesco Pugliese M.D., Giovanni Giordano MD

**Fondazione Policlinico Universitario Agostino Gemelli IRCCS, Rome:** Simone Carelli, M.D., Domenico Luca Grieco, M.D., Antonio Maria Dell'Anna, M.D., Massimo Antonelli M.D.

**Istituto Clinico Casal-Palocco, Rome 3, Rome:** Enrico Ramoni M.D., Josè Zulueta M.D., Mauro Del Giglio M.D., Sebastiano Petracca M.D.

**Azienda Ospedaliera Universitaria Pisana, Pisa:** Pietro Bertini, M.D., Ph.D., Fabio Guarracino, M.D., Luigi De Simone, M.D., Francesco Forfori, M.D., Ph.D.

**Ospedale di Teramo:** Paolo Matteo Angeletti, M.D., Francesco Taraschi, M.D., Veronica Nikka Quintiliani, M.D.

### **Lithuania:**

**Vilnius University Hospital Santariskiy Klinikos:** Robertas Samalavicius M.D., Ph.D., Agne Jankuviene M.D., Nadezda Scupakova M.D., Karolis Urbonas M.D.

**University Hospital Kaunas:** Juozas Kapturauskas M.D.

### **Norway:**

**Oslo University Hospital Rikshospitalet:** Gro Soerensen M.D.

### **Poland:**

Central Clinical Hospital Warsaw: Piotr Suwalski M.D.

### **Portugal:**

**Sao Joao University Hospital, Porto:** Luis Felipe Pinto MD

**Centro Hospitalar e Universitario de Coimbra:** Luis Linhares Santos MD, Ana Marques MD, Marisa Miranda MD, Sonia Teixeira MD, Andrea Salgueiro MD

**Santa Maria Hospital, Lisbon:** Filipe Pereira M.D.

### **Russian Federation:**

**Center Moscow City Hospital, Moscow:** Michail Ketskalo M.D., Sergey Tsarenko M.D., Alexandra Shilova M.D., Ivan Afukov M.D.

**NV Research Institute of Emergency Medicine, Sklifosovsky, Moscow:** Konstantin Popugaev M.D.

**Almazov Center, Saint Petersburg:** Sergei Minin M.D.

**Botkin Infection Hospital, Saint Petersburg:** Daniil Shelukhin M.D., Olga Malceva M.D.

**Novosibirsk National Medical Research Center, Novosibirsk:** Moroz Gleb, M.D.

**Krasnodar Regional Hospital:** Alexander Skopets M.D.

**Kemerovo Hospital:** Roman Kornelyuk M.D., Ph.D.

**Khabarovsk Hospital:** Alexandr Kulikov M.D.

**Krasnoyarsk Hospital:** Vadim Okhrimchuk M.D.

**Federal Center Chelyabinsk:** Alexandr Turchaninov M.D., Ph.D.

**The Nikiforov Russian Center of Emergency and Radiation Medicine, Saint Petersburg:** Daniil Shelukhin M.D., Ph.D.

**Tver Hospital, Tver:** Maxim Petrushin M.D.

**Barnaul Hospital, Barnaul:** Shek Anastasia M.D.

**Maykop Hospital:** Akhmed Mekulov M.D.

**Tyumen Hospital:** Svetlana Ciryateva M.D.

**Khanty Mansiysk Hospital:** Urusov Dmitry M.D.

#### **Slovenia:**

**University Medical Center Ljubljana:** Vojka Gorjup M.D., Ph.D., Alenka Golicnik M.D., Tomaz Goslar M.D.

#### **Spain:**

**Vall D'Hebron hospital Research Institute, Barcelona:** Ricard Ferrer Ph.D., Maria Martinez-Martinez M.D., Eduard Argudo MD, Neiser Palmer M.D.

**Ramon y Cajal University Hospital, Alcalà de Henares University, Madrid:** Raul de Pablo Sanchez M.D., Ph.D., Juan Higuera Lucas M.D., José Antonio Marquez M.D.

**University Hospital of Bellvitge, Barcelona:** Arnau Blasco Lucas M.D., Sbraga Fabrizio, Mari Paz Fuset M.D.

**Miguel Servet University Hospital, Zaragoza:** Pablo Ruiz de Gopegui, M.D., Luis Manuel Claraco, M.D., José Angel de Ayala, M.D., Maranta Peiro, M.D.

**Hospital Universitari Germans Trias i Pujol, Barcelona:** Pilar Ricart M.D., Ph.D., Segio Martinez MD, Fernando Chavez M.D., Marc Fabra M.D.

**Hospital Clinic, Barcelona:** Elena Sandoval M.D., FEBCTS, David Toapanta M.D., Albert Carraminana M.D., Adrian Tellez M.D., Jeysson Ososio M.D.

**Hospital Universitario La Paz, Madrid:** Pablo Milan M.D., Jorge Rodriguez M.D., Andoni Garcia M.D., Carola Gutierrez M.D.

**Hospital 12 de Octubre, Madrid:** Enrique Perez de la Sota M.D., FECTS, Andrea Eixerés-Esteve, M.D., María Teresa García-Maellas, RN, Judit Gutiérrez-Gutiérrez, M.D., Rafael Arboleda-Salazar, M.D.

**Hospital Universitario Gregorio Marañon, Madrid:** Patricia Santa Teresa M.D., Alexis Jaspe M.D., Alberto Garrido M.D., Galo Castaneda M.D.

**Hospital Universitario Puerta de Hierro Majadahonda, Madrid:** Sara Alcantara M.D. Ph.D., Nuria Martinez M.D., Marina Perez M.D., Hector Villanueva M.D.

**University Hospital Fundacion Jimenez Diaz and University Hospital Rey Juan Carlos, Madrid:** Anxela Vidal Gonzalez M.D., Juan Paez M.D., Arnoldo Santon M.D., Cesar Perez M.D.

**Hospital de Valdecilla, Santander:** Marta Lopez M.D., Maria Isabel Rubio Lopez M.D.

**Hospital Puerta del Mar, Cadiz:** Antonio Gordillo M.D.

**Hospital Reina Sofia, Cordoba:** Jose Naranjo-Izurietta M.D., Javier Munoz M.D., Immaculada Alcalde M.D., Fernando Onieva M.D.

**Hospital Universitari i Politecnic La Fe, Valencia:** Ricardo Gimeno Costa M.D., Francisco Perez M.D., Isabel Madrid M.D., Monica Gordon M.D.

**Virgen de la Arrixaca University Clinic Hospital, Murcia:** Carlos L Albacete Moreno M.D., Ph.D., Daniel Perez M.D., Nayara Lopez M.D., Domingo Martinenz M.D.

**Hospital Universitario Rio Hortega, Valladolid:** Pablo Blanco-Schweizer MD, Cristina Diez M.D., David Perez M.D., Ana Prieto M.D.

**University Clinical Hospital, Valladolid:** Gloria Renedo M.D., Elena Bustamante M.D., Ramon Cicuendez M.D., Rafael Citores M.D.

**Hospital Universitario Cruces Barakaldo, Bilbao:** Victoria Boado M.D., Katherine Garcia M.D., Roberto Voces M.D., Monica Domezain M.D.

**Hospital de Vinalopo Elche-Crevillente, Alicante:** José Maria Nunez Martinez MD, Raimundo Vicente M.D., David Martin M.D., Antonio Andreu M.D.

**Hospital Alvaro Cunqueiro, Vigo:** Vanesa Gomez Casal MD, Ignacio Chico M.D., Eva Maria Menor M.D., Sabela Vara M.D.

**Hospital Universitario Virgen Macarena, Sevilla:** Jose Gamacho M.D., Helena Perez-Chomon M.D., Francisco Javier Gonzales M.D., Irene Barrero M.D.

**Hospital Universitario Virgen del Rocío, Sevilla:** Luis Martin-Villen M.D., Esperanza Fernandez MD, Maria Mendoza M.D., Joaquin Navarro M.D.

**Hospital Universitario Son Espases, Palma de Mallorca:** Joaquin Colomina Climent M.D.

**Asturias University Hospital:** Alfredo Gonzales-Perez M.D., Guillermo Muniz-Albaiceta M.D., Laura Amado M.D., Raquel Rodriguez M.D.

**Santiago de Compostela Hospital:** Emilio Ruiz M.D., Maria Eiras M.D

### Sweden:

**Lund University hospital:** Edgars Grins M.D.

**University Hospital Linkoping:** Rosen Magnus M.D.

**University Hospital, Orebro:** Mikael Kanetoft ECCP, Marcus Eidevald M.D.

**Sahlgrenska University Hospital, Gothenburg:** Pia Watson RN

### Switzerland:

**University Hospital Zurich:** Paul Robert Vogt, M.D., Peter Steiger, M.D., Tobias Aigner MD

**Herzzentrum, Zurich:** Alberto Weber M.D., Jurg Grunefelder MD PhD, Martin Kunz M.D., Martin Grapow MD, Thierry Aymard M.D., Diana Reser M.D.

**Cardiocentro Ticino, Lugano:** Gianluca Agus M.D.

**University Hospital Bern:** Jolanda Consiglio ECCP, Prof. Matthias Haenggi MD, Jenni Hansjoerg ECCP, Manuela Iten, M.D.

**University Hospital Basel:** Thomas Doeble ECCP; Urs Zenklusen ECCP

**Centre Hospitalier Universitaire Vaudois Lausanne:** Xavier Bechtold ECCP, Giovanni Faedda M.D., Manuel Iafrate M.D., Amanda Rohier M.D., Layla Bergamaschi M.D.

### **The Netherlands:**

**Maastricht University Medical Centre:** Prof. Jos Maessen Ph.D.

**ERASMUS University Hospital, Rotterdam:** D. Reis Miranda, M.D., H. Endeman M.D., Ph.D., D. Gommers M.D., Ph.D., C. Meuwese M.D., Ph.D.

**Leiden University Medical Centre:** Jacinta Maas M.D., MJ van Gijlswijk, van Berg RN, Dario Candura, M.D.

**Breda Hospital:** Marcel van der Linden M.D., Merijn Kant MD

**University Medical Centre:** J.J van der Heijden M.D., Ph.D.

**St Antonius Ziekenhuis, Nieuwegeijn:** Eric Scholten M.D., Ph.D., Nicole van Belle-van Haren M.D.

**University Medical Center Amsterdam:** WK Lagrand MD, PhD, Alexander P. Vlaar M.D.

**Radboud University Medical Center Nijmegen:** Sytse de Jong ECCP

### **Turkey:**

**Kosuyolu High Specialization Education and Research Hospital, Istanbul:** Kaan Kirali, M.D.

**Kanuni Sultan Suleyman Training and Research Hospital, Istanbul:** Basar Cander M.D.

**Dr Siyami Ersek Cardiovascular Surgery Research and Training Hospital, Istanbul:** Murat Sargin M.D.

**Sancaktepe Sehit Prof Dr Ilhan Varank Training and Research Hospital, Istanbul:** Murat Ugur M.D.

**Health Sciences University Erzurum Regional Training and Research Hospital, Erzurum:** Mehmet Ali Kaygin M.D.

### **United Kingdom:**

**Guy's and Thomas's Hospital and NHS Foundation Trust, London:** Kathleen Daly M.D., Nicola Agnew M.D.

**Wythenshawe Hospital, Manchester:** Julian Barker, M.D., M.B.Ch.B., Laura Head, M.D., Laura Kelly MS

**Royal Brompton & Harefield, London:** Gunawardena Anoma, RN, Clare Russell, ACCP, Verna Aquino MD

**Aberdeen Royal Infirmary, Aberdeen:** Ian Scott MD, Lucy Flemming RN

**Royal Infirmary Hospital, Foresterhill Health Campus, Edinburgh:** Stuart Gillon M.D.

**Royal Papworth Hospital, Cambridge:** Olivia Moore MD

**Kings College Hospital, London:** Elton Gelandt, George Auzinger MD, Sameer Patel MD, Robert Loveridge M.D.

## **Supplementary Methods**

### *European Extracorporeal Life Support Organization (EuroELSO) and EuroECMO COVID Project*

EuroELSO is the European branch of the Extracorporeal Life Support Organization (ELSO). The objective of the organization is to provide support to institutions delivering extracorporeal life support through continuing education, sharing knowledge, updating on original research and publications.

Due to the rapid growth in the number of critically ill COVID-19 patients in Europe, an unexpected high number of severely compromised patients were considered eligible for extracorporeal membrane oxygenation (ECMO) support. For this reason, the Steering Committee of EuroELSO initiated a prospective observational study among European centers and adjacent countries including Belarus, Israel, Norway, Russian Federation and Switzerland with the intention of providing near-real time information on ECMO use in COVID-19.

The study, named European/EuroELSO Survey on COVID Adult Patient (EuroECMO-COVID), represented the first collaborative investigation to assist locally and globally in response to the COVID-19 outbreak. The aim of the study was to evaluate clinical features, severity of pulmonary dysfunction and risk factors in patients with COVID-19 who needed ECMO support, evaluate the technical characteristics, duration and complication of the extracorporeal support and the in-hospital and at 6 months outcomes of patients requiring ECMO. The data collection started on March 15<sup>th</sup> 2020 and weekly provided an anonymously report through the EuroELSO website (<https://www.euroelso.net/covid-19/covid-19-survey/>). The EuroELSO publication policy and data access is available in the EuroELSO website (addendum chapter Coronavirus COVID-19).

### *Definition of first COVID wave*

The definition of first COVID wave (March 1<sup>st</sup> to September 13<sup>th</sup>, 2020) applied in the current study was based on official statements of the World Health Organization ([who.int/director-general/speeches/detail/WHO-director-General's-opening-remarks-at-the-media-briefing-on-20200311](https://www.who.int/director-general/speeches/detail/WHO-director-General's-opening-remarks-at-the-media-briefing-on-20200311)) which declared the outbreak of COVID-19 as a pandemic on 11<sup>th</sup> March, 2020 and announced the secondary sanitary crisis at the end of September.

The following waves in European countries have a more nuanced temporal characterization due to the differences in stage of infection, the diverse control strategies (i.e. various lockdowns restrictions), the socio-demographic and socio-economic local characteristics, the different levels of air pollution and meteorological factors that may had influenced the spread of COVID-19 waves across the Europe.

### *Rationale for first wave analysis*

The current analysis of the EuroECMO-COVID Study was designed to evaluate singularly the first wave of the COVID-19 pandemic, while future analyses will focus on the subsequent waves. This study design was based on three major factors:

- The first wave was characterized by exceptional working conditions during an unexpected pandemic. This has pushed European centers to adapt their admission criteria based on a utilitarian medical approach with stricter admission criteria for ICU. Contrarily, the subsequent waves were characterized by more knowledge and greater resources, which have significantly influenced the patients' selection criteria.
- The medical approach to the first wave was significantly different compared to the following waves. Indeed, the first medical protocols were based on previous experiences, such as the one with the Middle East Respiratory Syndrome coronavirus infection epidemic in the Arabic peninsula. Furthermore, the unexpected emergency of COVID-19 during the influenza season has led to the extensive use of antibiotics, neuraminidase enzyme inhibitors, chloroquine, antiviral drugs, and hyperimmune plasma and immunoglobulins. Although some of these therapies might ultimately prove to be beneficial, they all had potential serious adverse event and several of them were abandoned during the following waves. For example, a recent Cochrane Analysis<sup>1</sup> on a widely used medication during the first COVID-19 wave, such as chloroquine and idoxichloroquine, showed that the use of these medications was related to a rate of adverse events that was triple compared to placebo. Furthermore, during the initial pandemic phase, the treatment approaches were selected according to the local access to different types of medications, hospital policies, and resource shortage.
- The patient population of the first wave was considered different from the subsequent waves in terms of time of intubation, mechanical ventilatory approach and discovery of different pattern of lung disease. Based on the results of these first experiences, the following COVID-19 waves could benefit from a more structured clinical approach.

For these reasons, the first pandemic wave was considered as a unique and not a comparable event. Future investigations focused on the following COVID-19 waves are warranted to investigate the evolution of this disease and its clinical approach.

## Data Collection

The following predefined variables were collected:

- Demographic data: age, sex, race, weight, height and body mass index
- Patients comorbidities: chronic obstructive pulmonary disease, diabetes, cardiovascular disease, renal insufficiency, arterial hypertension, smoking, obesity
- Pre ECMO characteristics:
  1. Timing: time onset symptoms to intensive care admission, time onset symptoms to orotracheal intubation, time intensive care admission to orotracheal intubation, duration of mechanical ventilation, time orotracheal intubation to tracheostomy
  2. Medical therapy: antibiotics, antiviral drugs, steroids, immunomodulators, convalescent plasma, inotropes, vasopressors, second line therapy (prone therapy and number of proning session, neuromuscular blockage, inhaled nitric oxide)
  3. Gas exchange before ECMO implant: pH, PaO<sub>2</sub>, PaCO<sub>2</sub>, FiO<sub>2</sub>
- ECMO Characteristics:
  1. ECMO configuration (veno-venous, veno-arterial, hybrid or other), time orotracheal intubation to ECMO start, implant indication, type of vascular access (femoro-femoral, double lumen cannula in jugular vein, femoro-jugular, jugular-femoral, femoro-axillary, central cannulation, pulmonary artery cannulation), distal perfusion (when indicated), presence and type of left ventricle venting system, adjunctive treatments to ECMO (renal replace therapy, plasmapheresis, Cytosorb, leukopheresis, molecular adsorbent recirculating system), ECMO configuration change, configuration after change, indication for variation of ECMO configuration, time ECMO onset and ECMO new configuration, maximum blood flow on ECMO
  2. Medical therapy on ECMO: anticoagulation and type (heparin, bivalirudin, argatroban or other), antiplatelets (aspirin, clopidogrel or other)
  3. Complications: multi-organ-failure, sepsis, renal failure, bleeding, neurological complications (ischemic stroke, hemorrhagic stroke, intracranial bleeding, seizure, delirium), gastro-intestinal complications (bowel ischemia, gastro-intestinal bleeding, ileus, gastro-intestinal perforation), pulmonary complications (pneumothorax, pulmonary embolism, hemothorax, pulmonary sovra-infection, pulmonary abscess, acquired hospital pneumonia, ventilatory acquired pneumonia)
- Outcome in-hospital: ECMO weaning, time ECMO start to ECMO weaning, overall time in intensive care unit, overall time in hospital, death, reason for death, time ECMO start to death, death after weaning, time ECMO start to death after weaning, reasons for death after weaning
- Outcome 6 months follow-up: alive at 6 months, lung transplant, time ECMO start to lung transplant, heart transplant, time ECMO start to heart transplant, persistent dyspnea o limited effort at 6 months, persistent oxygen requirements at 6 months, ongoing respiratory rehabilitation at 6 months, still on mechanical ventilation at 6 months, in hospital/nursing home at 6 months, cardiac symptoms at 6 months ( tachycardia, exhaustion, new cardiac therapy), cognitive problems at 6 months, back to work at 6 months (part time, full time)



## Supplemental Tables

**Supplemental Table 1:** Variables and outcomes definitions.

| VARIABLE                        | DEFINITION                                                                                                                                                                                                                                                                         |
|---------------------------------|------------------------------------------------------------------------------------------------------------------------------------------------------------------------------------------------------------------------------------------------------------------------------------|
| <b>Comorbidities</b>            |                                                                                                                                                                                                                                                                                    |
| Arterial Hypertension           | Systolic blood pressure > 140 mmHg or diastolic blood pressure > 90 mmHg, or use of antihypertensive agent to maintain normal blood pressure                                                                                                                                       |
| Diabetes                        | Chronic metabolic disease characterized by elevated level of blood glucose over a prolonged period of time (any type 1, 2, gestational)                                                                                                                                            |
| COPD                            | Diagnosis of chronic obstructive pulmonary disease, any Gold classification                                                                                                                                                                                                        |
| Cardiovascular disease          | Disease affecting heart and blood vessel including arrhythmia, valve disease, coronary artery disease, heart failure, peripheral artery disease, congenital heart disease, pericardial disease, deep vein thrombosis                                                               |
| Renal Insufficiency             | Reduced kidney function due to renal artery disease                                                                                                                                                                                                                                |
| Smoking                         | Active (smoking during the past 30 days) and more than 100 cigarettes during lifetime                                                                                                                                                                                              |
| Obesity                         | Excessive fat accumulation (Body mass index > 30)                                                                                                                                                                                                                                  |
| <b>ECMO details</b>             |                                                                                                                                                                                                                                                                                    |
| <b>1) Indications</b>           |                                                                                                                                                                                                                                                                                    |
| ARDS                            | Acute diffuse inflammatory lung injury requiring invasive mechanical ventilation or extracorporeal membrane oxygenation                                                                                                                                                            |
| Pneumonia                       | Any suspected pulmonary infection treated with antibiotics                                                                                                                                                                                                                         |
| Septic shock                    | Sepsis with vasopressors requirement to maintain MAP > 65 mmHg and serum lactate levels greater than 2 mmol/L in absence of hypovolemia                                                                                                                                            |
| Myocarditis/Cardiac dysfunction | Inflammation of myocardium with necrosis of cardiac myocytes due to infection, cardiotoxin, drugs and systemic disorder or idiopathic/ cardiac dysfunction inability to provide the necessary blood flow for metabolic and functional need of vital organs under normal conditions |
| Isolated ventricular failure    | Altered ventricle function due to direct or indirect damage that reduce the pump ability of the heart                                                                                                                                                                              |
| Pulmonary Embolism              | Condition due to a sudden blockage to a lung artery                                                                                                                                                                                                                                |
| eCPR                            | Implantation of veno-arterial ECMO in patient who experienced a sudden pulseless condition due to the cessation of cardiac mechanical function                                                                                                                                     |
| Postpartum                      | Cardiac and or lung dysfunction related to infection or sepsis, major bleeding, cardiomyopathy, thrombotic pulmonary embolism, stroke, amniotic fluid embolism                                                                                                                     |
| <b>2) Type of ECMO</b>          |                                                                                                                                                                                                                                                                                    |
| Veno-venous (V-V)               | Configuration able to maintain gas exchange (oxygenation and removal of CO <sub>2</sub> ) in isolated lung failure and preserved cardiac output                                                                                                                                    |
| Veno-Arterial (V-A)             | Configuration that bypass lungs and heart in order to provide respiratory and circulatory support                                                                                                                                                                                  |

|                             |                                                                                                                                                                   |
|-----------------------------|-------------------------------------------------------------------------------------------------------------------------------------------------------------------|
| Veno-Arterial Venous (V-AV) | Configuration with an extra inflow cannula to provide increased delivering of oxygenated blood to the pulmonary circulation and correct differential hypoxemia    |
| Veno-Venoarterial (VVA)     | Configuration with an extra arterial perfusion cannula when patient on VV ECMO have hemodynamic deterioration and require cardio-circulatory support              |
| Oxy-RVAD                    | Right ventricular assist device with an oxygenator using ECMO with drainage cannulation from the femoral vein and return cannulation to the main pulmonary artery |
| Other                       | Various others configuration involving more than three cannula to support dynamic evolution during the ECMO course                                                |

### 3) Indications for changing ECMO configuration

|                           |                                                                                                                                                                                              |
|---------------------------|----------------------------------------------------------------------------------------------------------------------------------------------------------------------------------------------|
| Left ventricular failure  | Dysfunction of the left ventricle resulting insufficient delivery of blood to vital organs either with preserved or reduced ejection fraction                                                |
| Right ventricular failure | Evidence of right-sided structural and/or functional abnormalities in combination with clinical symptoms and signs of RV failure                                                             |
| Bi-ventricular failure    | Biventricular dysfunction accompanied by both signs and symptoms of right-sided and left-sided heart failure                                                                                 |
| Refractory hypoxemia      | Persistent PaO <sub>2</sub> less than 60 mmHg for at least 1 hour while receiving FiO <sub>2</sub> 1.0                                                                                       |
| Cannulation site bleeding | Blood loss from the access cannulation site with inevitable treatment (by cannula removal and compression or by vascular surgery)                                                            |
| Leg ischemia              | Clinical signs of lower extremity ischemia requiring intervention (either by vascular surgery or cannula removal)                                                                            |
| Drainage problem          | Inability to adequately support a patient on ECMO due to impaired blood aspiration from the cannula due to hypovolemia, kinks in the circuit, cannula malposition or inadequate cannula size |

### Complications

|                       |                                                                                                                                                                                                                                                                                                                              |
|-----------------------|------------------------------------------------------------------------------------------------------------------------------------------------------------------------------------------------------------------------------------------------------------------------------------------------------------------------------|
| Renal failure         | Renal function at less than 15% of normal levels, either acute or chronic                                                                                                                                                                                                                                                    |
| Major bleeding        | According to the ISTH criteria in non -surgical patients is defined as having a symptomatic presentation and is divided in fatal bleeding and/ or bleeding in a critical area or organ and/or bleeding causing a fall in hemoglobin level of 2 g/dL or more, or leading to transfusion of two or more packed red blood cells |
| Ischemic stroke       | Neurological dysfunction by focal brain with clinical symptoms lasting less more than 24 hours, with or without permanent disability                                                                                                                                                                                         |
| Intracranial bleeding | Bleeding between the brain tissue and skull or within the brain tissue itself                                                                                                                                                                                                                                                |

|                                |                                                                                                                                                                                                                                                                       |
|--------------------------------|-----------------------------------------------------------------------------------------------------------------------------------------------------------------------------------------------------------------------------------------------------------------------|
| Seizures                       | Burst of uncontrolled electrical activity between brain cells that causes temporary abnormalities in muscle tone or movements, behaviors, sensations or states of awareness                                                                                           |
| Delirium                       | Disturbance in mental abilities that results in confused thinking and reduced awareness of the environment                                                                                                                                                            |
| Bowel ischemia                 | Intestinal ischemia with elevated lactate levels requiring abdominal surgical intervention                                                                                                                                                                            |
| GI bleeding                    | any type of bleeding that starts in the digestive tract, due to a disease or a condition itself                                                                                                                                                                       |
| Ileus requiring medications    | Ileus is an occlusion or paralysis of the bowel preventing the passage of intestinal content, causing their accumulation proximal to the site of blockage due to mechanical or functional conditions                                                                  |
| GI perforation                 | any part of the gastrointestinal tract can present (acutely or in an indolent manner) a perforation with consequent releasing of gastric or intestinal content into the peritoneal space                                                                              |
| Pneumothorax/Pneumomediastinum | Abnormal collection of air in the pleural space between the lung and the chest wall/abnormal collection of air in the mediastinum                                                                                                                                     |
| Lung bleeding                  | Extravasation of blood into airways and/or lung parenchyma                                                                                                                                                                                                            |
| Hemothorax                     | Collection of blood in the space between the chest wall and the pleural cavity                                                                                                                                                                                        |
| Pulmonary sovrainfection       | secondary infection that occurs during an existing infection, or immediately following a previous infection, particularly caused by microorganisms that are resistant or have become resistant to antibiotics used earlier                                            |
| Pulmonary abscess              | Microbial infection of the lung that results in necrosis of pulmonary parenchyma                                                                                                                                                                                      |
| HAP/VAP                        | HAP or nosocomial pneumonia refers to any pneumonia contracted by a patient in hospital at least 48-72 hours after being admitted/VAP is a hospital acquired pneumonia that occurs more than 48 hours after having been intubated and received mechanical ventilation |
| <b>Outcomes</b>                |                                                                                                                                                                                                                                                                       |
| Respiratory failure            | reversible pulmonary disease which cannot anymore be managed by conventional mechanical ventilation and/or ECMO despite pharmacological intervention                                                                                                                  |
| cardiac arrest                 | Abrupt loss of heart function despite acute and simple interventions such as pacing and defibrillation                                                                                                                                                                |
| Neurological injury            | Non- traumatic brain injuries caused by lack of oxygen, toxin exposure or pressure from an hemorrhagic or ischemic lesion                                                                                                                                             |
| Sepsis                         | Life-threatening organ dysfunction caused by a dysregulated host response to an infection                                                                                                                                                                             |

|                                                                                                                   |                                                                                                                                                                                                                                                                                                                                                                                                                                                                                                                                                                                                                                                                                                                                                                                                                                                                                                                                                                                                                                                                                     |
|-------------------------------------------------------------------------------------------------------------------|-------------------------------------------------------------------------------------------------------------------------------------------------------------------------------------------------------------------------------------------------------------------------------------------------------------------------------------------------------------------------------------------------------------------------------------------------------------------------------------------------------------------------------------------------------------------------------------------------------------------------------------------------------------------------------------------------------------------------------------------------------------------------------------------------------------------------------------------------------------------------------------------------------------------------------------------------------------------------------------------------------------------------------------------------------------------------------------|
| MOF                                                                                                               | Hypometabolic state with involvement of more than one organ as established by biochemical and/or radiological analysis                                                                                                                                                                                                                                                                                                                                                                                                                                                                                                                                                                                                                                                                                                                                                                                                                                                                                                                                                              |
| <b>Follow up 6 months</b>                                                                                         |                                                                                                                                                                                                                                                                                                                                                                                                                                                                                                                                                                                                                                                                                                                                                                                                                                                                                                                                                                                                                                                                                     |
| <p>Persistent Dyspnea</p> <p>Persistent requirements Oxygen</p> <p>Cardiac symptoms</p> <p>Cognitive problems</p> | <p>shortness of breath lasting longer than one month, according to ATS chronic dyspnea is a subjective experience of breathing discomfort that consist of qualitatively distinct sensations that vary in intensity. When shortness of breath is greater than expected for a given level of exertion is considered pathologic and a symptom of disease</p> <p>LTOT is a treatment to improve survival in patients with chronic severe daytime hypoxemia, can be defined as oxygen used for at least 15 h per day in chronically hypoxaemic patients (PaO<sub>2</sub> &lt; 7.3 kPa)</p> <p>Temporary or lasting damage due to hypoxic injury, myocarditis, ischemic injury, stress cardiomyopathy, cytokine storm related to COVID-19 infection characterized by arrhythmias, dizziness, chest discomfort and shortness of breath</p> <p>Signs and symptoms that develop during or after COVID-19 infection, continue for more than 12 weeks and not explained by an alternative diagnosis. According to MoCA score: cognitive deficit in memory, executive function and language</p> |

**Supplemental Table 2- Patients' Characteristics after Multiple Inputations for Cox Regression**

|                                                        | Full Cohort<br>(n=1215) | In-hospital Survivors<br>(n=613) | In-hospital Non<br>Survivors<br>(n=602) | p-value |
|--------------------------------------------------------|-------------------------|----------------------------------|-----------------------------------------|---------|
| <b>Age - years</b>                                     | 54 (46-61)              | 51,0 (43-58)                     | 58,0 (50-62)                            | <0,001  |
| <b>Age - categories</b>                                |                         |                                  |                                         |         |
| < 59 years old                                         | 840 (69,1%)             | 489 (79,8%)                      | 351 (58,4%)                             |         |
| 60-69 years old                                        | 325 (26,7%)             | 117 (19,1%)                      | 208 (34,4%)                             |         |
| ≥ 70 years old                                         | 50 (4,1%)               | 7 (1,1%)                         | 43 (7,2%)                               |         |
| <b>Sex- n, %</b>                                       |                         |                                  |                                         |         |
| Male                                                   | 946 (77,9%)             | 467 (76,2%)                      | 479 (79,5%)                             |         |
| Female                                                 | 269 (22,1%)             | 146 (23,8%)                      | 123 (20,5%)                             |         |
| <b>Race- n, %</b>                                      |                         |                                  |                                         |         |
| White (non-hispanic)                                   | 880 (72,4%)             | 417 (68%)                        | 463 (77,0%)                             |         |
| Asian                                                  | 162 (13,3%)             | 99 (16,2%)                       | 63 (10,3%)                              |         |
| Black                                                  | 95 (7,8%)               | 52 (8,5%)                        | 43 (7,2%)                               |         |
| Hispanic                                               | 78 (6,4%)               | 45 (7,3%)                        | 33 (5,5%)                               |         |
| <b>BMI</b>                                             | 29,2 (26,0-32,9)        | 29,3 (26,0-33,0)                 | 29,0 (26,0-32,8)                        | 0,593   |
| <b>Co-existing condition- n, %</b>                     |                         |                                  |                                         |         |
| <b>BMI class</b>                                       |                         |                                  |                                         |         |
| BMI ≤ 29.9 Kg/m2                                       | 679 (55,9%)             | 342 (55,8%)                      | 337 (55,9%)                             |         |
| Obesity class I                                        | 324 (26,7%)             | 163 (26,6%)                      | 161 (26,8%)                             |         |
| Obesity class II                                       | 121 (10%)               | 55 (9%)                          | 66 (11,0%)                              |         |
| Obesity class III                                      | 91 (7,5%)               | 53 (8,6%)                        | 38 (6,3%)                               |         |
| <b>Pre-existing Comorbidities- n,%</b>                 |                         |                                  |                                         |         |
| Diabetes                                               | 288 (23,7%)             | 127 (20,7%)                      | 161 (26,8%)                             |         |
| Arterial Hypertension                                  | 507 (41,7%)             | 220 (35,9%)                      | 287 (47,6%)                             |         |
| Cardiovascular Disease                                 | 149 (12,3%)             | 55 (9%)                          | 94 (15,5%)                              |         |
| Renal Failure                                          | 55 (4,5%)               | 15 (2,4%)                        | 40 (6,7%)                               |         |
| Chronic Obstructive Pulmonary Disease                  | 91 (7,5%)               | 27 (4,4%)                        | 64 (10,5%)                              |         |
| <b>COVID-19 Medical therapy- n;%</b>                   |                         |                                  |                                         |         |
| Antiviral Drugs                                        | 626 (51,5%)             | 291 (47,5%)                      | 335 (55,6%)                             |         |
| <b>Pre-ECLS Support n;%</b>                            |                         |                                  |                                         |         |
| Prone Therapy before ECLS                              | 1003 (82,6%)            | 407 (82,9%)                      | 495 (73,7%)                             |         |
| Inotropes                                              | 432 (35,6%)             | 172 (28,1%)                      | 260 (43,1%)                             |         |
| Vasopressors                                           | 958 (78,8%)             | 454 (74,1%)                      | 504 (83,9%)                             |         |
| <b>Time from Intubation to ECLS cannulation - days</b> | 4 (2-8)                 | 4 (1-7)                          | 5 (2-9)                                 | 0,008   |
| <b>Indication for ECLS - n, %</b>                      |                         |                                  |                                         |         |
| ARDS                                                   | 972 (80%)               | 495 (80,8%)                      | 477                                     |         |
| Pneumonia                                              | 177 (14,6%)             | 83 (13,5%)                       | 94                                      |         |
| Septic Shock                                           | 15 (1,2%)               | 9 (1,5%)                         | 6                                       |         |
| Myocarditis/ Cardiac Dysfunction                       | 28 (2,3%)               | 16 (2,6%)                        | 12                                      |         |
| Isolated Ventricular Failure                           | 6 (0,5%)                | 3 (0,5%)                         | 3                                       |         |
| Pulmonary Embolism                                     | 10 (0,8%)               | 6 (1%)                           | 4                                       |         |
| Cardiac arrest                                         | 7 (0,6%)                | 1 (0,2%)                         | 6                                       |         |
| <b>Type of ECLS- n,%</b>                               |                         |                                  |                                         |         |
| VV ECLS                                                | 1105 (90,9%)            | 561 (91,5%)                      | 544                                     |         |
| VA ECLS                                                | 89 (7,3%)               | 42 (6,9%)                        | 47                                      |         |
| V-AV ECLS                                              | 10 (0,8%)               | 7 (1,1%)                         | 3                                       |         |

|                                        |                    |                    |            |
|----------------------------------------|--------------------|--------------------|------------|
| VV-A ECLS                              | 7 (0,6%)           | 1 (0,2%)           | 6          |
| OxyRVAD                                | 4 (0,3%)           | 0 (0%)             | 0          |
| Other ECLS                             | 0 (0%)             | 2 (0,3%)           | 2          |
| <b>ECLS Configuration Change- n,%</b>  | <b>128 (10,5%)</b> | <b>45 (7,3%)</b>   | <b>83</b>  |
| <b>Renal Failure</b>                   |                    |                    |            |
| No Renal Failure                       | 506 (41,6%)        | 329 (53,7%)        | 177        |
| Renal Failure without RRT              | 445 (36,6%)        | 171 (27,9%)        | 274        |
| Renal Failure with RRT                 | 264 (21,7%)        | 113 (18,4%)        | 151        |
| <b>Pneumothorax- n,%</b>               | <b>236 (19,4%)</b> | <b>91 (14,8%)</b>  | <b>145</b> |
| <b>Ischemic Stroke- n,%</b>            | <b>60 (4,9%)</b>   | <b>21 (3,4%)</b>   | <b>39</b>  |
| <b>Hemorrhagic Stroke- n,%</b>         | <b>73 (6,0%)</b>   | <b>19 (3,1%)</b>   | <b>54</b>  |
| <b>Intracranial Bleeding- n,%</b>      | <b>134 (11%)</b>   | <b>47 (7,7%)</b>   | <b>87</b>  |
| <b>Gastro-intestinal Bleeding- n,%</b> | <b>139 (11,4%)</b> | <b>60 (9,8%)</b>   | <b>79</b>  |
| <b>Bowel Ischemia- n,%</b>             | <b>86 (7,1%)</b>   | <b>19 (3,1%)</b>   | <b>67</b>  |
| <b>Lung Bleeding- n,%</b>              | <b>168 (13,8%)</b> | <b>64 (10,4%)</b>  | <b>104</b> |
| <b>Pulmonary Embolism- n,%</b>         | <b>172 (14,2%)</b> | <b>87 (14,2%)</b>  | <b>85</b>  |
| <b>Pulmonary Sovrainfection- n,%</b>   | <b>485 (39,9%)</b> | <b>229 (37,4%)</b> | <b>256</b> |

Data are reported as n (% of available data) or median (IQR, interquartile range)Ys: years. BMI, Body Mass Index. ICU: Intensive Care Unit. ECLS: Extracorporeal Membrane Oxygenation; ARDS: Acute Respiratory, Distress Syndrome; ARF: Acute Respiratory Failure. V-V:veno-venous.V-A: veno-arterial.OxyRVAD: Oxygenator in right ventricular assist device. MARS: Molecular Adsorbent Recirculating System.

**Supplemental Table 3-** Numbers and rates of collected and missing 6-month data.

|                                        | <b>Valid (n)</b> | <b>Missing (n)</b> | <b>Valid (%)</b> | <b>Missing (%)</b> |
|----------------------------------------|------------------|--------------------|------------------|--------------------|
| <b>Alive 6 months</b>                  | 577              | 36                 | 94.13            | 5.87               |
| <b>Persistent Dyspnea 6 months</b>     | 523              | 90                 | 85.32            | 14.68              |
| <b>Persistent Oxygen 6 months</b>      | 521              | 92                 | 84.99            | 15.01              |
| <b>Respiratory Rehab at 6 months</b>   | 522              | 91                 | 85.15            | 14.85              |
| <b>Still on Mechanical Ventilation</b> | 528              | 85                 | 86.13            | 13.87              |
| <b>In hospital nursing home</b>        | 523              | 90                 | 85.32            | 14.68              |
| <b>Cardiac symptom 6 months</b>        | 514              | 99                 | 83.85            | 16.15              |
| <b>Cognitive problem</b>               | 512              | 101                | 83.52            | 16.48              |
| <b>Back to work part time</b>          | 428              | 185                | 69.82            | 30.18              |
| <b>Back to work full time</b>          | 431              | 182                | 70.31            | 29.69              |

**Supplemental table 4 - Contributing centers and geographical distribution.**

|                                                   | <b>Centers<br/>n, %</b> |
|---------------------------------------------------|-------------------------|
| <b>Number of Patients per Contributing Center</b> |                         |
| 0-9                                               | 91 (68.4%)              |
| 10-19                                             | 29 (21.8%)              |
| 20-39                                             | 9 (6.8%)                |
| 40-60                                             | 4 (3.0%)                |
| <b>Country</b>                                    |                         |
| Austria                                           | 5 (3.8%)                |
| Belgium                                           | 15 (11.3%)              |
| Czech Republic                                    | 2 (1.5%)                |
| Denmark                                           | 2 (1.5%)                |
| Estonia                                           | 2 (1.5%)                |
| France                                            | 9 (6.8%)                |
| Germany                                           | 13 (9.8%)               |
| Ireland                                           | 1 (0.8%)                |
| Israel                                            | 8 (6.0%)                |
| Italy                                             | 18 (13.5%)              |
| Lithuania                                         | 1 (0.8%)                |
| Poland                                            | 1 (0.8%)                |
| Portugal                                          | 4 (3.0%)                |
| Russia                                            | 5 (3.8%)                |
| Slovenia                                          | 1 (0.8%)                |
| Spain                                             | 22 (16.5%)              |
| Sweden                                            | 4 (3.0%)                |
| Switzerland                                       | 4 (3.0%)                |
| The Netherlands                                   | 6 (4.5%)                |
| Turkey                                            | 4 (3.0%)                |
| United Kingdom                                    | 6 (4.5%)                |



**Supplemental Table 5 - Number of patients based on geographical distribution.**

|                 | <b>Patients<br/>n, %</b> |         |
|-----------------|--------------------------|---------|
| <b>Country</b>  |                          |         |
| Austria         | 33                       | (2.7%)  |
| Belgium         | 98                       | (8.1%)  |
| Czech Republic  | 10                       | (0.8%)  |
| Denmark         | 26                       | (2.1%)  |
| Estonia         | 4                        | (0.3%)  |
| France          | 114                      | (9.4%)  |
| Germany         | 180                      | (14.8%) |
| Ireland         | 5                        | (0.4%)  |
| Israel          | 54                       | (4.4%)  |
| Italy           | 134                      | (11.0%) |
| Lithuania       | 5                        | (0.4%)  |
| Poland          | 11                       | (0.9%)  |
| Portugal        | 47                       | (3.9%)  |
| Russia          | 44                       | (3.6%)  |
| Slovenia        | 3                        | (0.2%)  |
| Spain           | 158                      | (13.0%) |
| Sweden          | 38                       | (3.1%)  |
| Switzerland     | 22                       | (1.8%)  |
| The Netherlands | 20                       | (1.6%)  |
| Turkey          | 9                        | (0.7%)  |
| United Kingdom  | 200                      | (16.5%) |

Supplementary Figure

Figure S1: ROC curve with best predicting cutoff at different time points (0,30, 60, 90, 120, 150, 180 months)

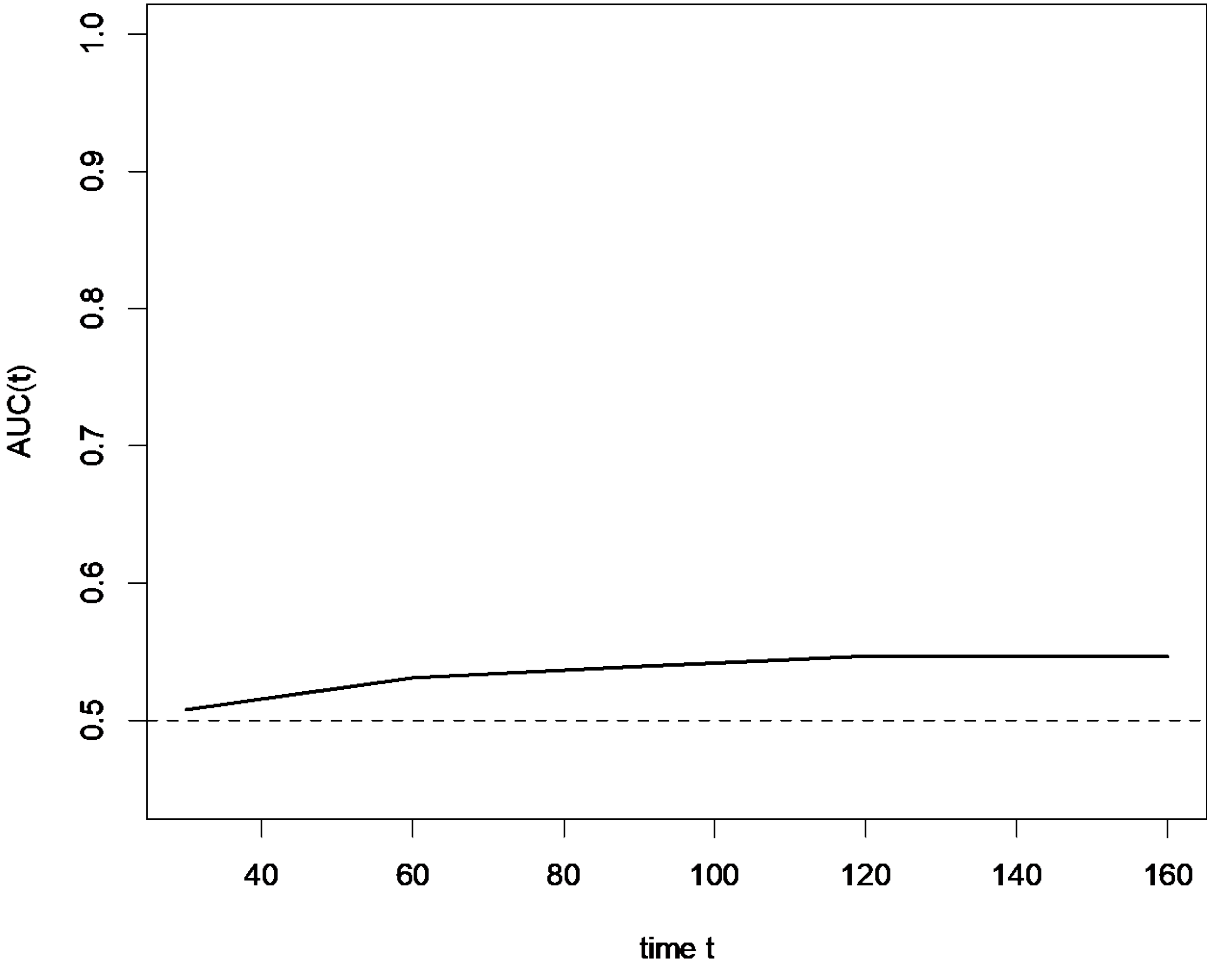

Figure S2: Calibration Plot Model 1

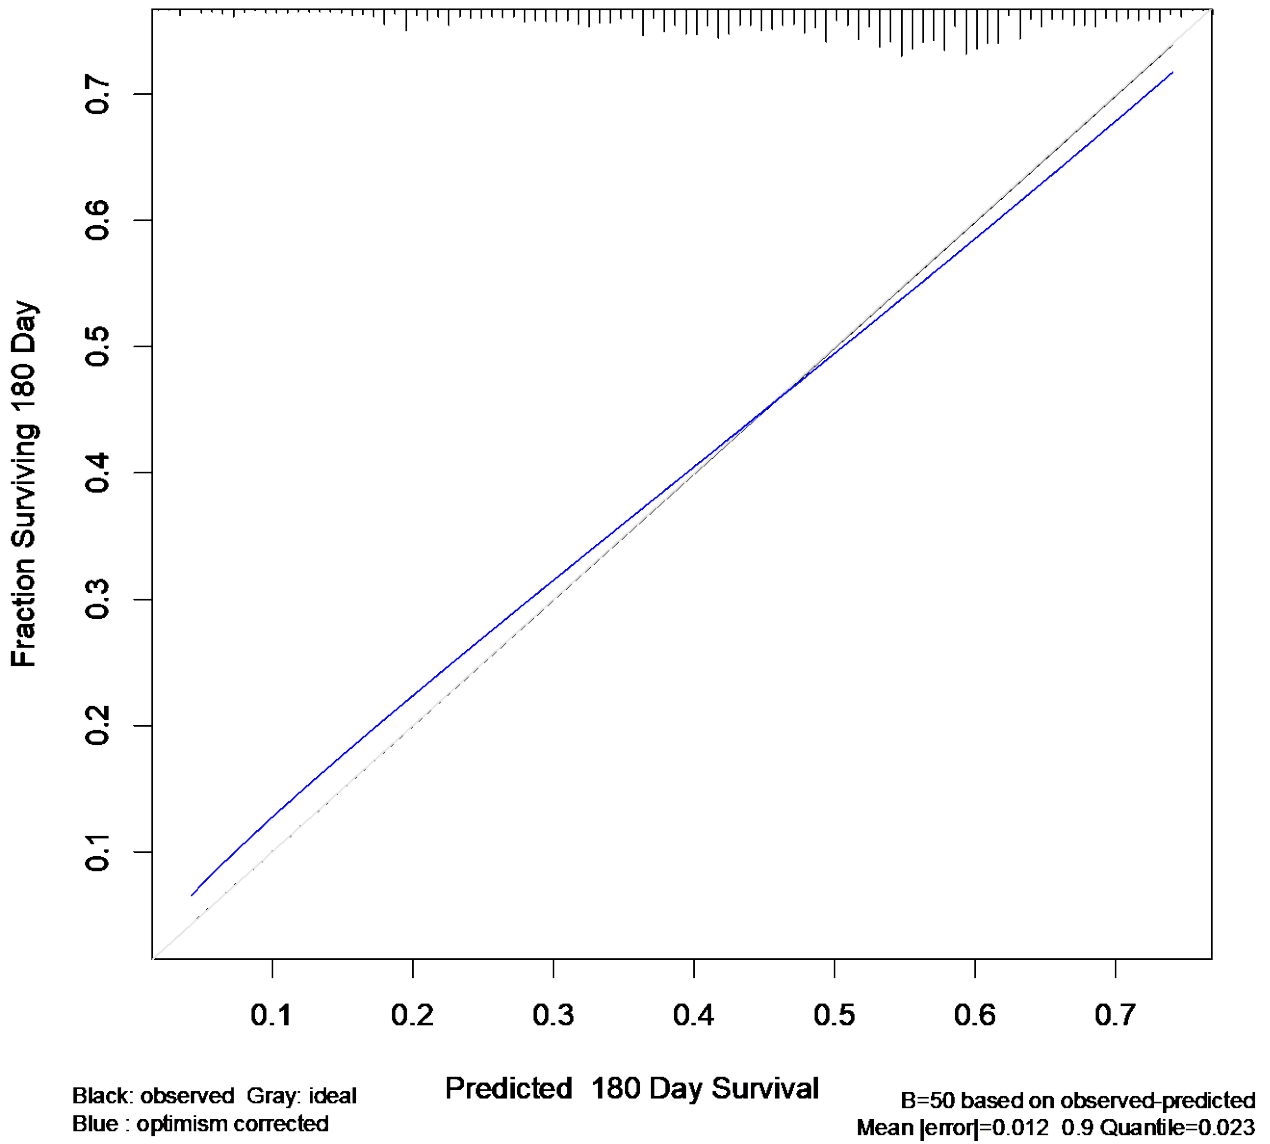

Figure S3: Calibration Plot Model 2

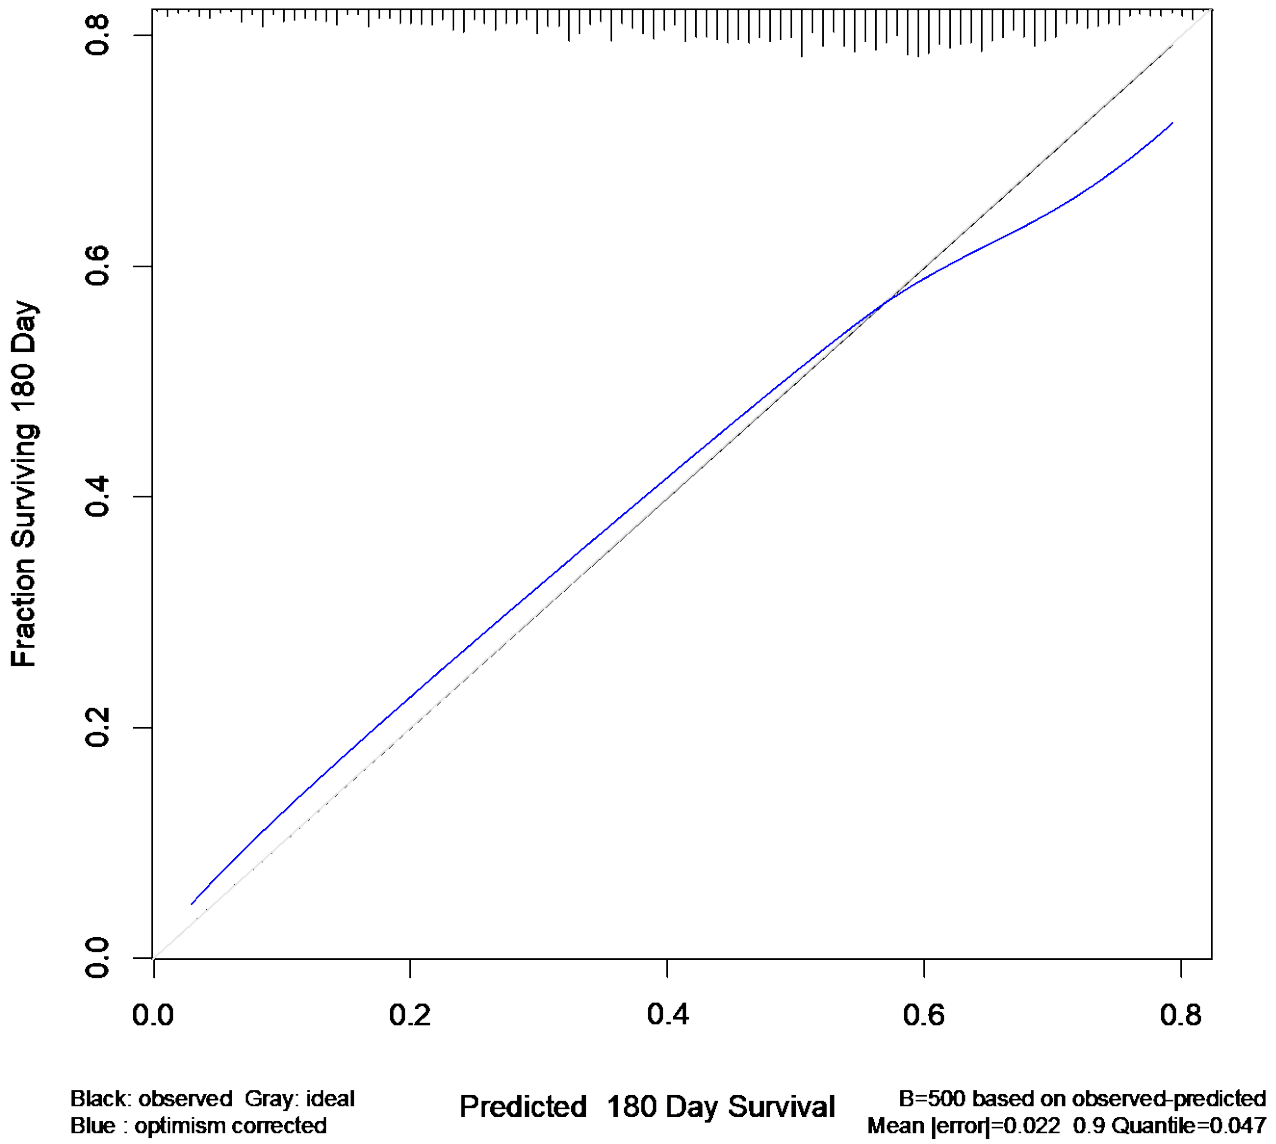

**S4: Kaplan Maier curves according to variables significantly associated with in-hospital mortality (Model 1)**

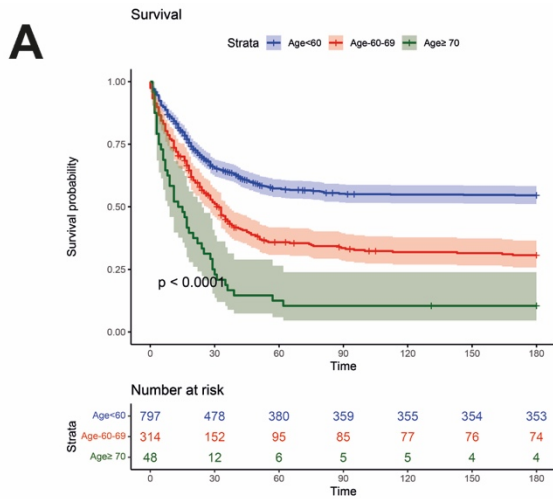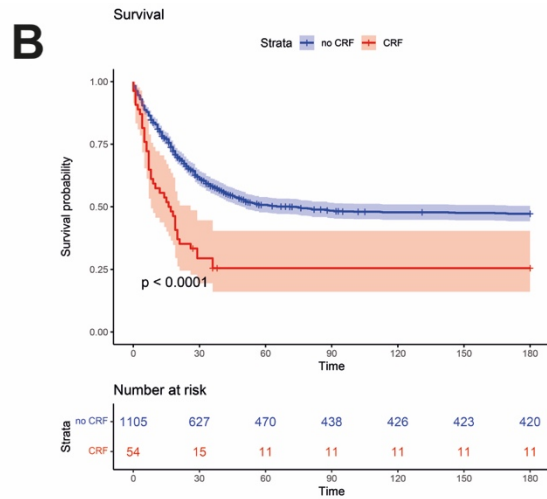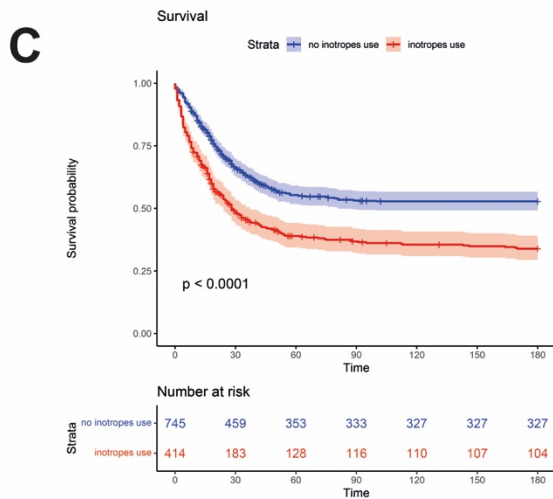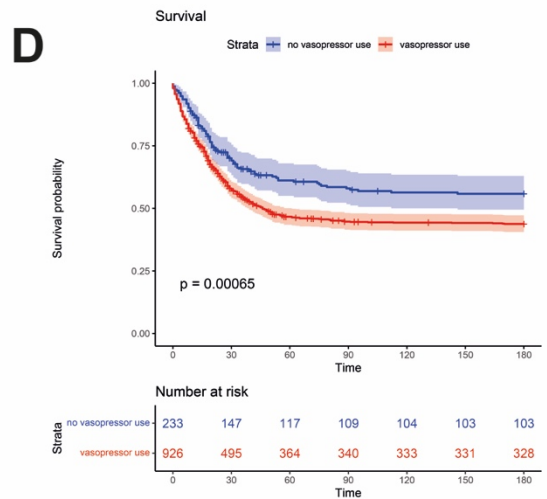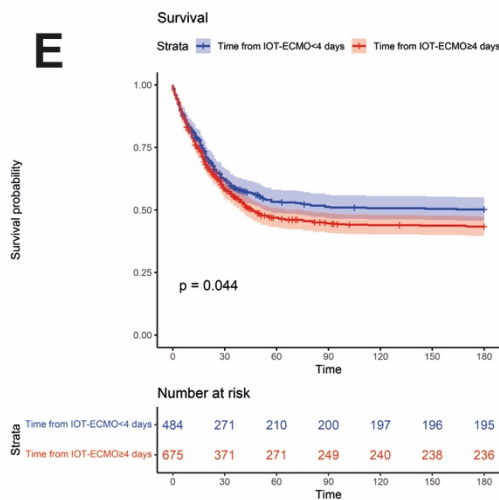

**Figure S5: Kaplan Maier curves according to variables significantly associated with in-hospital mortality (Model 2)**

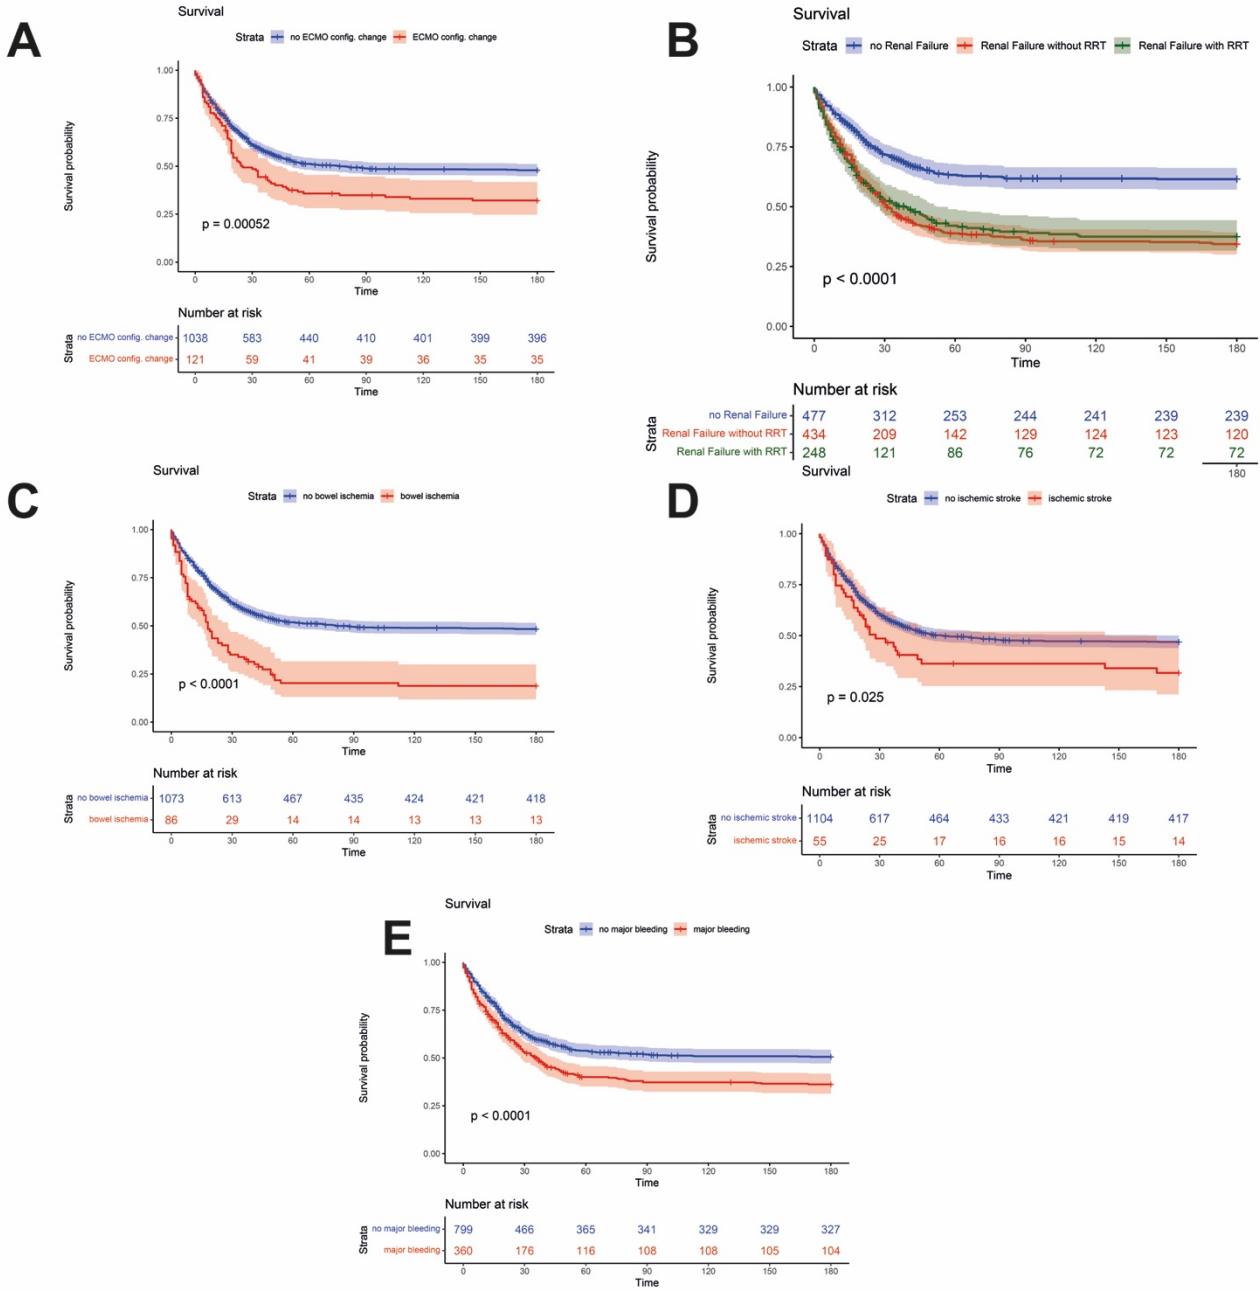

**Figure S6:** Geographical distribution of EuroECMO-COVID Contributing Centers.

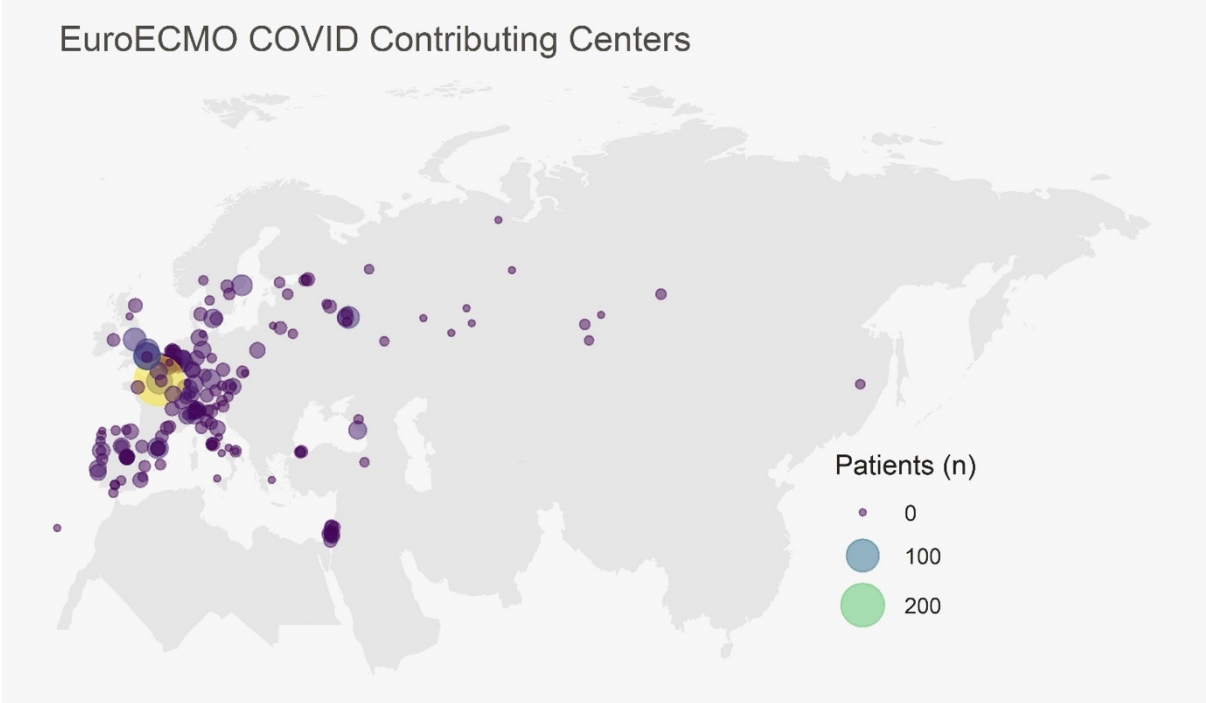

STROBE Statement—checklist of items that should be included in reports of observational studies

|                              | Item No | Recommendation                                                                                                                                                                                                                                                                                                                                                                                                                                                                                                                                                                                                                                                                                                                                              |
|------------------------------|---------|-------------------------------------------------------------------------------------------------------------------------------------------------------------------------------------------------------------------------------------------------------------------------------------------------------------------------------------------------------------------------------------------------------------------------------------------------------------------------------------------------------------------------------------------------------------------------------------------------------------------------------------------------------------------------------------------------------------------------------------------------------------|
| <b>Title and abstract</b>    | 1       | Indicate the study’s design with a commonly used term in the title or the abstract<br><b>Multi-center observational study as stated in the Abstract pag 3 and Methods pag 4-5</b><br>Provide in the abstract an informative and balanced summary of what was done and what was found<br><b>Provided in Abstract pag 3</b>                                                                                                                                                                                                                                                                                                                                                                                                                                   |
| <b>Introduction</b>          |         |                                                                                                                                                                                                                                                                                                                                                                                                                                                                                                                                                                                                                                                                                                                                                             |
| Background/rationale         | 2       | Explain the scientific background and rationale for the investigation being reported<br><b>Included in Introduction pag 4</b>                                                                                                                                                                                                                                                                                                                                                                                                                                                                                                                                                                                                                               |
| Objectives                   | 3       | State specific objectives, including any prespecified hypotheses<br><b>Included in Introduction pag 4</b>                                                                                                                                                                                                                                                                                                                                                                                                                                                                                                                                                                                                                                                   |
| <b>Methods</b>               |         |                                                                                                                                                                                                                                                                                                                                                                                                                                                                                                                                                                                                                                                                                                                                                             |
| Study design                 | 4       | Present key elements of study design early in the paper<br><b>Included in Methods pag 4-5</b>                                                                                                                                                                                                                                                                                                                                                                                                                                                                                                                                                                                                                                                               |
| Setting                      | 5       | Describe the setting, locations, and relevant dates, including periods of recruitment, exposure, follow-up, and data collection<br><b>Included in Methods pag 5</b>                                                                                                                                                                                                                                                                                                                                                                                                                                                                                                                                                                                         |
| Participants                 | 6       | <i>Cohort study</i> —Give the eligibility criteria, and the sources and methods of selection of participants. Describe methods of follow-up<br><b>Included in Methods pag 4-5</b><br><i>Case-control study</i> —Give the eligibility criteria, and the sources and methods of case ascertainment and control selection. Give the rationale for the choice of cases and controls<br><i>Cross-sectional study</i> —Give the eligibility criteria, and the sources and methods of selection of participants<br><i>(b) Cohort study</i> —For matched studies, give matching criteria and number of exposed and unexposed<br><i>Case-control study</i> —For matched studies, give matching criteria and the number of controls per case<br><b>Not applicable</b> |
| Variables                    | 7       | Clearly define all outcomes, exposures, predictors, potential confounders, and effect modifiers. Give diagnostic criteria, if applicable<br><b>Included in Methods pag 5</b>                                                                                                                                                                                                                                                                                                                                                                                                                                                                                                                                                                                |
| Data sources/<br>measurement | 8*      | For each variable of interest, give sources of data and details of methods of assessment (measurement). Describe comparability of assessment methods if there is more than one group<br><b>Included in Methods pag 4-5</b>                                                                                                                                                                                                                                                                                                                                                                                                                                                                                                                                  |
| Bias                         | 9       | Describe any efforts to address potential sources of bias<br><b>Included in Limitations pag 11-12</b>                                                                                                                                                                                                                                                                                                                                                                                                                                                                                                                                                                                                                                                       |
| Study size                   | 10      | Explain how the study size was arrived at<br><b>Included in Methods pag 5</b>                                                                                                                                                                                                                                                                                                                                                                                                                                                                                                                                                                                                                                                                               |
| Quantitative variables       | 11      | Explain how quantitative variables were handled in the analyses. If applicable, describe which groupings were chosen and why<br><b>Included in Methods pag 4-5</b>                                                                                                                                                                                                                                                                                                                                                                                                                                                                                                                                                                                          |
| Statistical methods          | 12      | Describe all statistical methods, including those used to control for confounding<br><b>Included in Statistical analysis pag 6-7</b><br>Describe any methods used to examine subgroups and interactions<br><b>Included in Statistical analysis pag 6-7</b><br>Explain how missing data were addressed<br><b>Included in Statistical analysis pag 6</b><br><i>Cohort study</i> —If applicable, explain how loss to follow-up was addressed                                                                                                                                                                                                                                                                                                                   |



Included in Statistical analysis pag 6 and in Limitations pag 12

*Case-control study*—If applicable, explain how matching of cases and controls was addressed

*Cross-sectional study*—If applicable, describe analytical methods taking account of sampling strategy

(e) Describe any sensitivity analyses

| <b>Results</b>           |     |                                                                                                                                                                                                                                                                                                                                                                                                                                                                                                                                |
|--------------------------|-----|--------------------------------------------------------------------------------------------------------------------------------------------------------------------------------------------------------------------------------------------------------------------------------------------------------------------------------------------------------------------------------------------------------------------------------------------------------------------------------------------------------------------------------|
| Participants             | 13* | Report numbers of individuals at each stage of study—eg numbers potentially eligible, examined for eligibility, confirmed eligible, included in the study, completing follow-up, and analysed<br><b>Included in Results pag 7-8</b><br>Give reasons for non-participation at each stage<br><b>Not applicable</b><br>Consider use of a flow diagram<br><b>Include in Supplementary material Supplementary Figure 1</b>                                                                                                          |
| Descriptive data         | 14* | Give characteristics of study participants (eg demographic, clinical, social) and information on exposures and potential confounders<br><b>Included in Results pag 7-8</b><br>Indicate number of participants with missing data for each variable of interest<br><b>Included in Results pag 7-8</b><br><i>Cohort study</i> —Summarise follow-up time (eg, average and total amount)<br><b>Included in Results pag 8</b>                                                                                                        |
| Outcome data             | 15* | <i>Cohort study</i> —Report numbers of outcome events or summary measures over time<br><b>Included in Results pag 7-8 and Tables 1 and 2</b><br><i>Case-control study</i> —Report numbers in each exposure category, or summary measures of exposure<br><i>Cross-sectional study</i> —Report numbers of outcome events or summary measures                                                                                                                                                                                     |
| Main results             | 16  | Give unadjusted estimates and, if applicable, confounder-adjusted estimates and their precision (eg, 95% confidence interval). Make clear which confounders were adjusted for and why they were included<br><b>Included in Results page 7-8 and Tables 1, 2 and 3</b><br>Report category boundaries when continuous variables were categorized<br><b>Included in Results page 7-8 and Tables 1,2 and 3</b><br>(c) If relevant, consider translating estimates of relative risk into absolute risk for a meaningful time period |
| Other analyses           | 17  | Report other analyses done—eg analyses of subgroups and interactions, and sensitivity analyses<br><b>Included in Statistical analysis pag 7</b>                                                                                                                                                                                                                                                                                                                                                                                |
| <b>Discussion</b>        |     |                                                                                                                                                                                                                                                                                                                                                                                                                                                                                                                                |
| Key results              | 18  | Summarise key results with reference to study objectives<br><b>Included in Discussion pag 9-11</b>                                                                                                                                                                                                                                                                                                                                                                                                                             |
| Limitations              | 19  | Discuss limitations of the study, taking into account sources of potential bias or imprecision. Discuss both direction and magnitude of any potential bias<br><b>Included in Limitations pag 11-12</b>                                                                                                                                                                                                                                                                                                                         |
| Interpretation           | 20  | Give a cautious overall interpretation of results considering objectives, limitations, multiplicity of analyses, results from similar studies, and other relevant evidence<br><b>Included in Discussion pag 9, 10,11 and Limitations pag 11, 12</b>                                                                                                                                                                                                                                                                            |
| Generalisability         | 21  | Discuss the generalisability (external validity) of the study results<br><b>Included in Discussion pag 9-10</b>                                                                                                                                                                                                                                                                                                                                                                                                                |
| <b>Other information</b> |     |                                                                                                                                                                                                                                                                                                                                                                                                                                                                                                                                |
| Funding                  | 22  | Give the source of funding and the role of the funders for the present study and, if applicable, for the original study on which the present article is based<br><b>Included in role of funding pag 7</b>                                                                                                                                                                                                                                                                                                                      |

\*Give information separately for cases and controls in case-control studies and, if applicable, for exposed and unexposed groups in cohort and cross-sectional studies.

**Note:** An Explanation and Elaboration article discusses each checklist item and gives methodological background and published examples of transparent reporting. The STROBE checklist is best used in conjunction with this article (freely available on the Web sites of PLoS Medicine at <http://www.plosmedicine.org/>, Annals of Internal Medicine at <http://www.annals.org/>, and Epidemiology at <http://www.epidem.com/>). Information on the STROBE Initiative is available at [www.strobe-statement.org](http://www.strobe-statement.org).

## Supplementary References

1. Singh B, Ryan H, Kredo T, Chaplin M, Fletcher T. Chloroquine or hydroxychloroquine for prevention and treatment of COVID-19. *Cochrane Database Syst Rev* 2021; **2**(2): Cd013587.
